# Supplementary material for: Regulatory T cells expressing granzyme B play a critical role in controlling lung inflammation during acute viral infection
Source: PubMed Central journal article supplement — Mucosal Immunol. 2012 Jan 11;5(2):161–72. doi: 10.1038/mi.2011.62 (PMC3282434; doi:10.1038/mi.2011.62), 2012-01-11
Supplement: mi201162x1.pdf [file mi201162x1.pdf]

## **Supplementary Material**

### **Regulatory T cells expressing granzyme B play a critical role in controlling lung inflammation during acute viral infection**

Jens Loebbermann, Hannah Thornton, Lydia Durant, Tim Sparwasser, Kylie E. Webster, Jonathan Sprent, Fiona J. Culley, Cecilia Johansson and Peter J. Openshaw

# Supplementary Figure S1

a

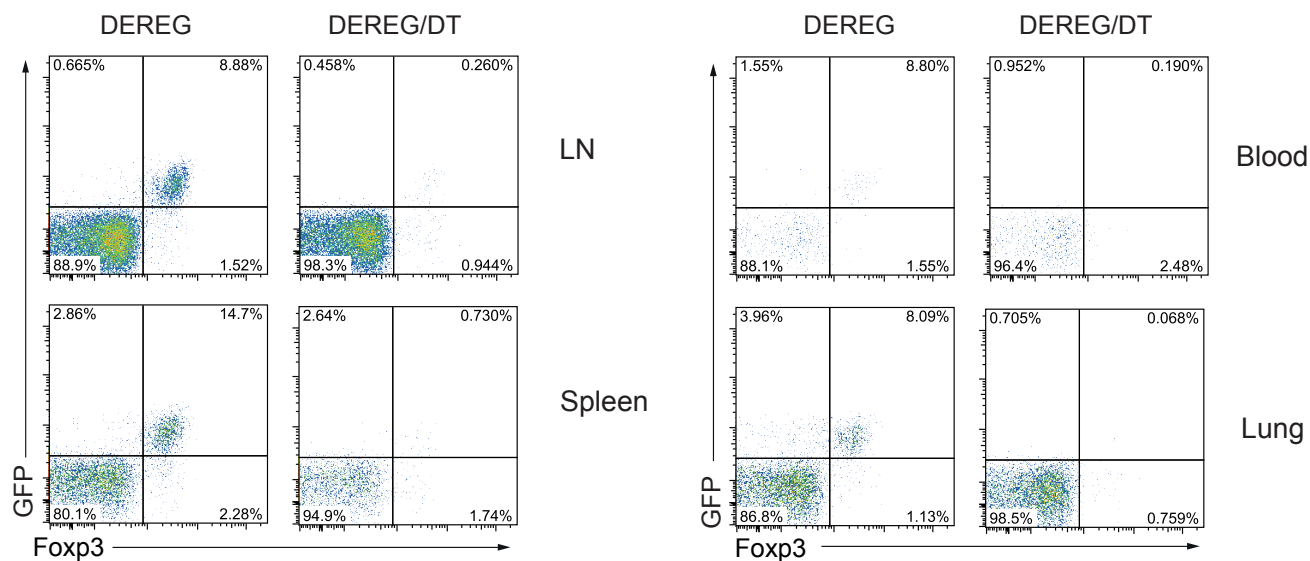

b

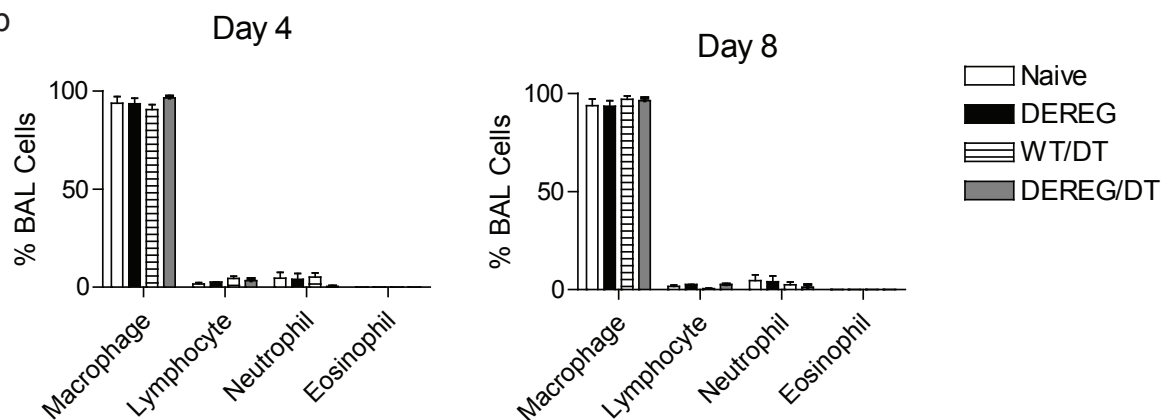

c

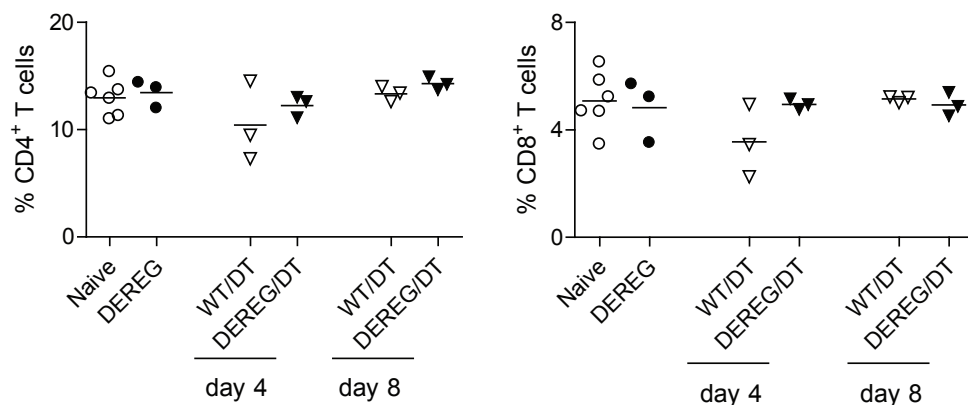

**Supplementary Figure S1.** Treg depletion in DERE mice. DERE BALB/c mice were injected with DT on day -2, -1, 2 and 5 when indicated (a) Mesenteric LN, spleen, blood and lung were analyzed for Fopx3<sup>+</sup>GFP<sup>+</sup> cells by flow cytometry on day 0. Cells are previously gated on CD3<sup>+</sup>CD4<sup>+</sup> cells. (b) DERE and WT BALB/c mice were, when indicated, injected with DT on day -2, -1, 2 and 5 and harvested at different time points. Frequencies of macrophages, lymphocytes, neutrophils and eosinophils in the BAL were quantified using differential cell counting of H&E stained cytopsin slides on day 4 (left) and 8 (right). (c) Frequencies of CD4<sup>+</sup>Fopx3<sup>-</sup> T cells and CD8<sup>+</sup> T cells in the lung were quantified using flow cytometry on day 4 and 8. Error bars indicate the SEM. Graphs are representative of two independent experiments with 3-4 mice per group.

## Supplementary Figure S2

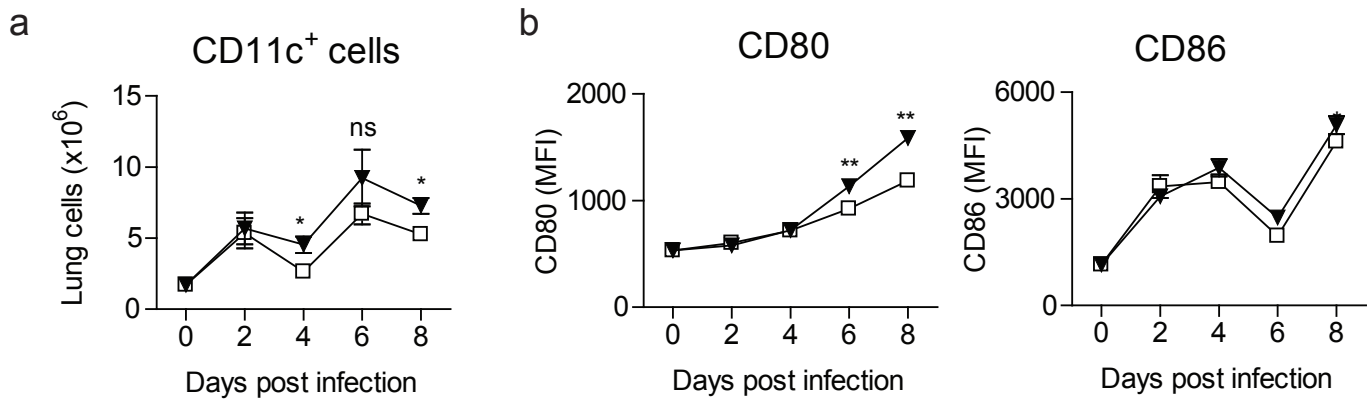

**Supplementary Figure S2.** Depletion of Foxp3<sup>+</sup> cells increases CD11c<sup>+</sup> cells during RSV infection of BALB/c mice. BALB/c mice and BALB/c DEREG mice were infected with RSV i.n. (day 0) (RSV and DEREG/RSV). When indicated, RSV infected DEREG or WT mice were injected i.p. (days -2,-1, 2, and 5) with 0.75  $\mu$ g DT (DEREG/RSV/DT and RSV/DT). **(a)** Total numbers of CD11c<sup>+</sup> cells in the lung were enumerated on day 2, 4, 6 and 8 post infection. **(b)** Quantification of the MFI of CD80 and CD86 expression on CD11c<sup>+</sup> cells in the lung at different time points after RSV infection. Error bars indicate the SEM. Graphs are representative of two independent experiments with 4 mice per group in each.

## Supplementary Figure S3

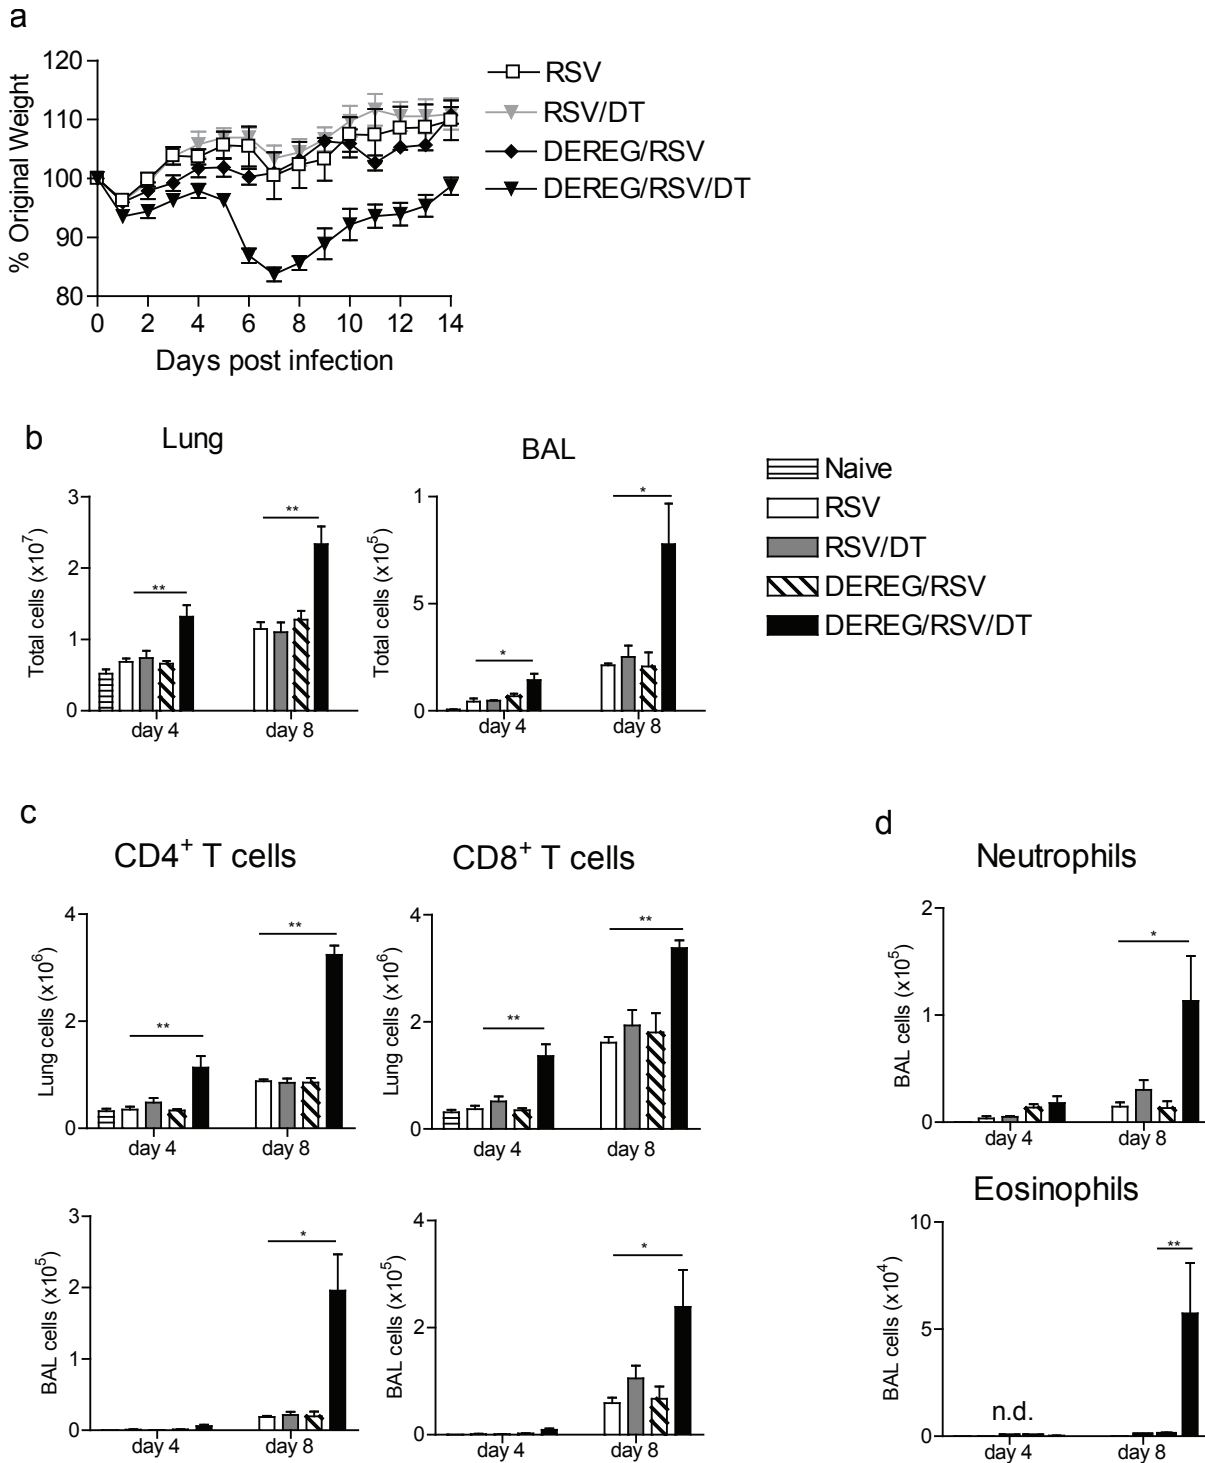

**Supplementary Figure S3.** Depletion of Foxp3<sup>+</sup> cells increases cellular influx in the lungs and weight loss during RSV infection of C57BL/6 mice. C57BL/6J (WT) mice and C57BL/6J DEREG mice were infected with RSV i.n. (day 0) (RSV and DEREG/RSV). When indicated, RSV infected DEREG or WT mice were injected i.p. (days -2,-1, 2, 5 and 8) with 0.75  $\mu$ g DT (DEREG/RSV/DT and RSV/DT). **(a)** Illness was monitored daily by weight for 14 days after RSV infection; percentage of original weight is shown. **(b)** Total numbers of cells in the lung and BAL were enumerated on day 4 and 8 post infection. **(c)** Total numbers of CD3 gated CD4<sup>+</sup>Foxp3<sup>-</sup> and CD8<sup>+</sup> T cells in the lung and BAL were quantified using flow cytometry on day 4 and 8 post RSV infection. **(d)** Total numbers of neutrophils and eosinophils in the BAL were quantified using differential cell counting on day 4 and 8 post infection. Error bars indicate the SEM. Graphs are representative of at least three independent experiments with 4 mice per group in each.

## Supplementary Figure S4

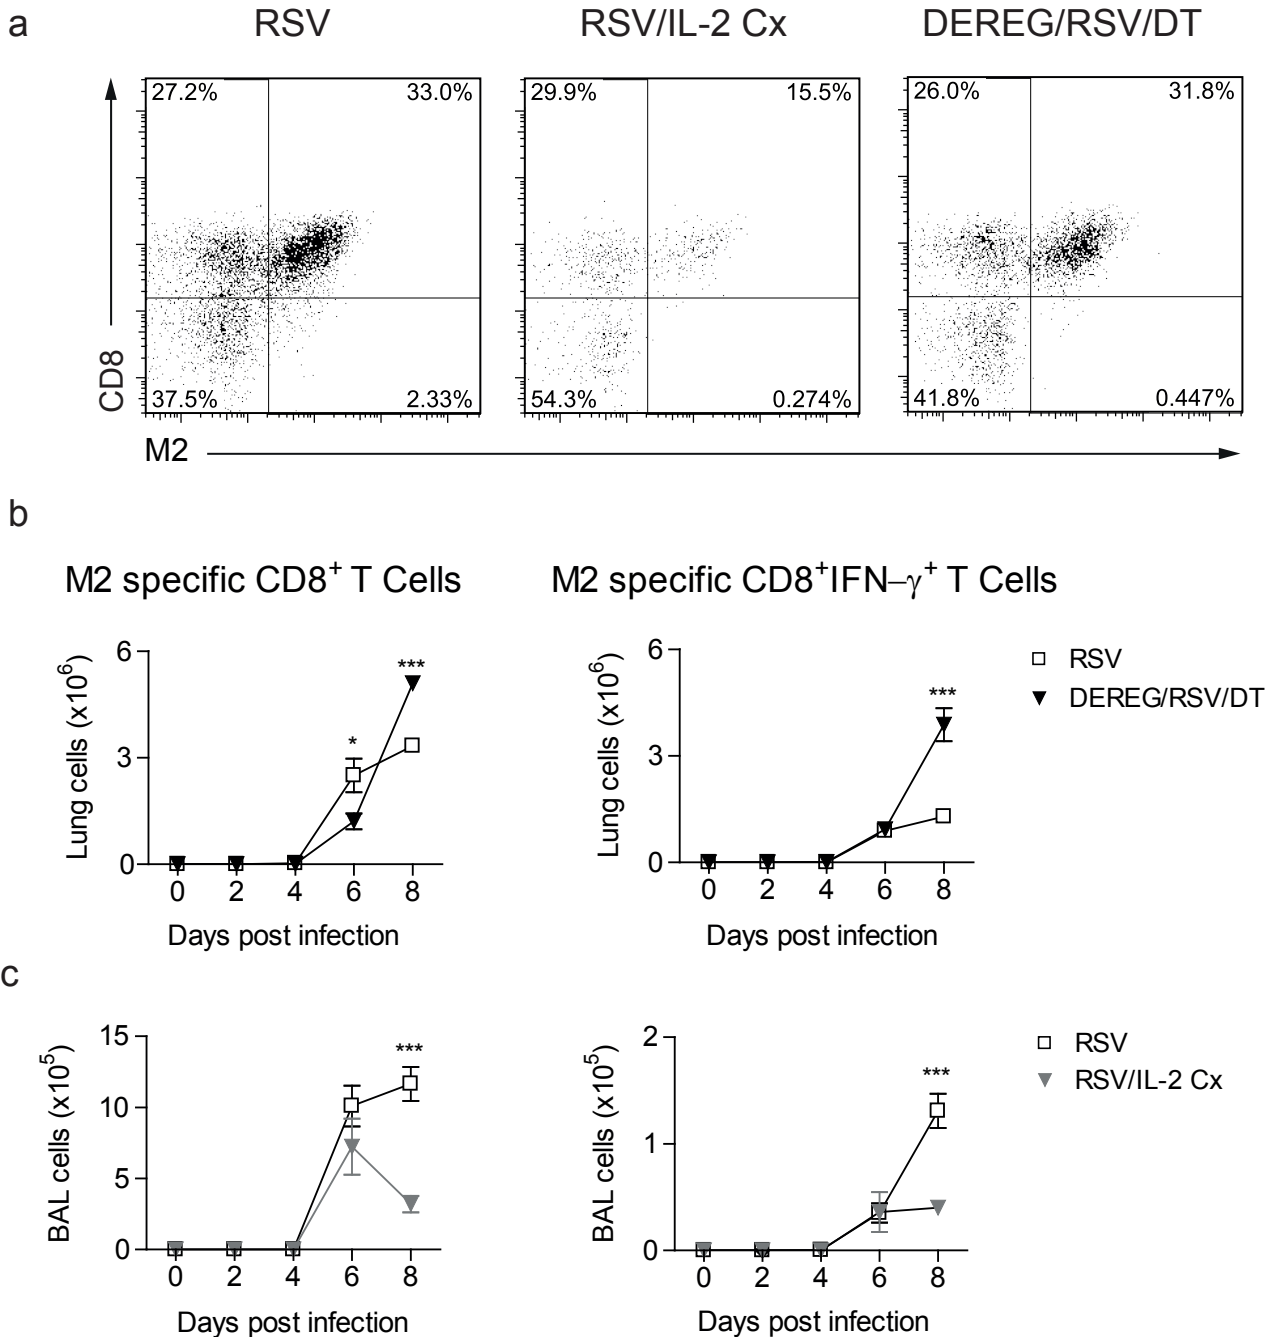

**Supplementary Figure S4.** Tregs control RSV antigen specific CD8<sup>+</sup> T cells in lung and BAL. BALB/c mice or BALB/c DEREG mice were infected with 10<sup>6</sup> FFU RSV i.n. (day 0). Where indicated, mice were injected i.p (days -2, -1, 2, 5 and 8) with 0.75  $\mu$ g DT or IL-2 Cx (days 1, 2 and 3). **(a)** CD3 gated, M2 pentamer positive CD8<sup>+</sup> T cells in the BAL were analyzed by flow cytometry on day 8 post infection. **(b)** Total numbers of CD3 gated, M2 pentamer<sup>+</sup> CD8<sup>+</sup> T cells and M2 peptide restimulated CD8<sup>+</sup>IFN- $\gamma$ <sup>+</sup> T cells in the lung from Treg depleted mice were quantified using flow cytometry. **(c)** Total numbers of CD3 gated, M2 pentamer<sup>+</sup> CD8<sup>+</sup> T cells and M2 peptide restimulated CD8<sup>+</sup>IFN- $\gamma$ <sup>+</sup> T cells in the BAL from IL-2 Cx injected mice were quantified using flow cytometry. Error bars indicate the SEM. Graphs are representative of two independent experiments with 5 mice per group.

## Supplementary Figure S5

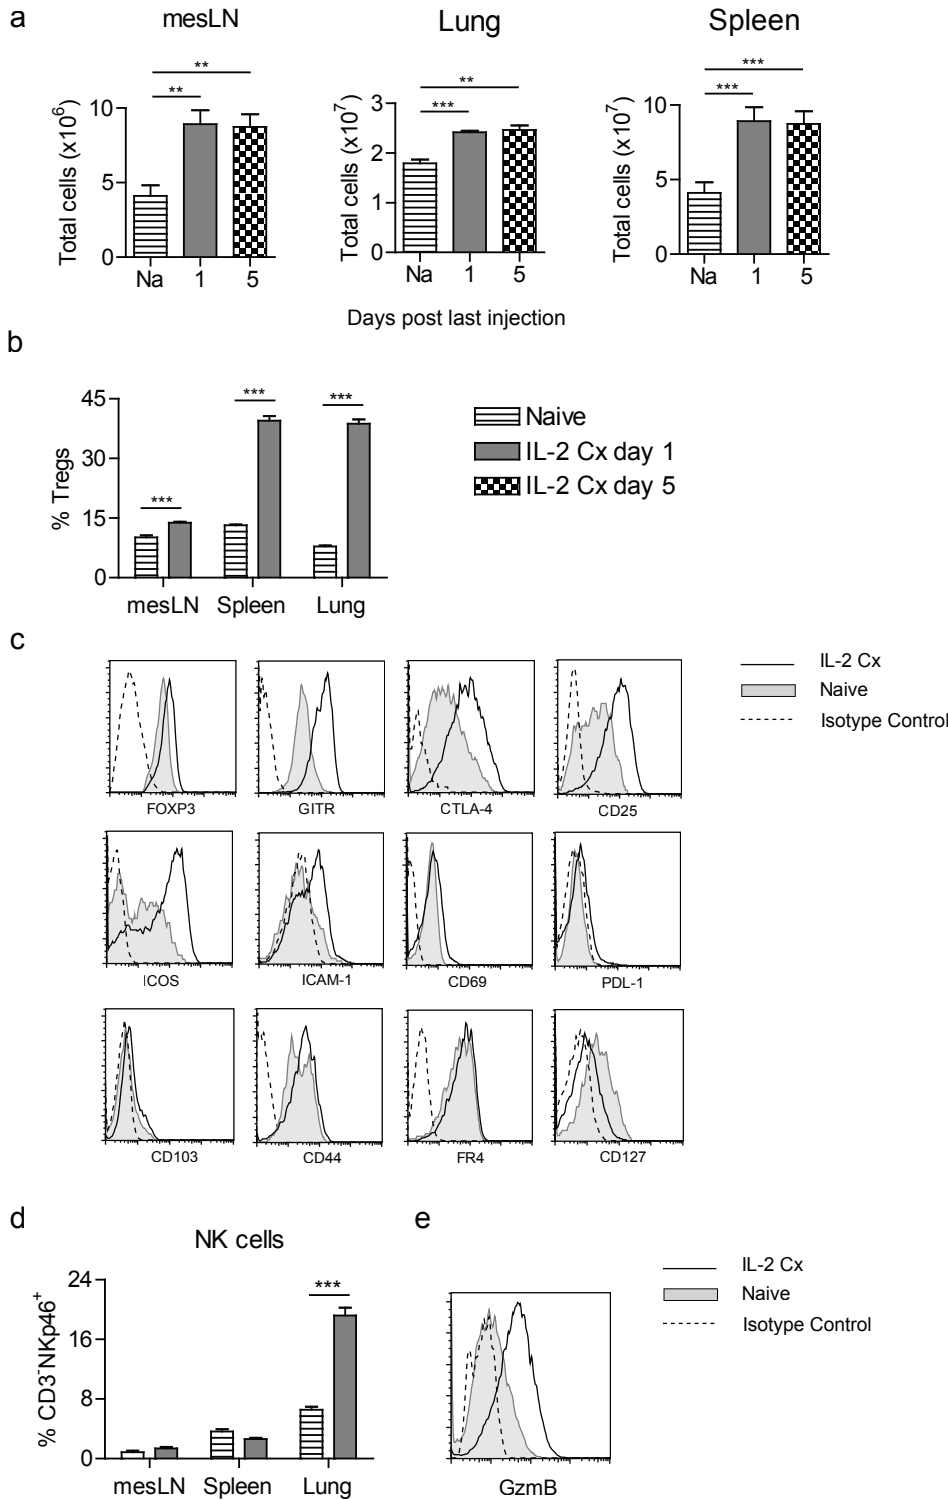

**Supplementary Figure S5.** IL-2 Cx injections expand and activate Tregs and lung NK cells. Lungs from mice injected i.p. daily for 3 d (days -2, -1 and 0) with IL-2 Cx were analyzed on day 1 and 5 after the last IL-2 Cx injection. **(a)** Total numbers of cells were enumerated in the mesenteric (mes) LNs, lung and spleen on day 1 and day 5 after the last IL-2 Cx injection. **(b)** Frequencies of Tregs (CD4<sup>+</sup>Foxp3<sup>+</sup>) were determined in the mesenteric LN, spleen and lung of naïve mice or day 1 after IL-2 Cx injections. **(c)** Lung Tregs (CD4<sup>+</sup> Foxp3<sup>+</sup>) were analyzed for expression of cell surface molecules on day 1 after IL-2 Cx injections. **(d)** Frequency of NK cells (CD3<sup>+</sup> NKp46<sup>+</sup>) in the mesLN, spleen and lung of naive mice or day 1 after IL-2 Cx injections was assessed by flow cytometry. **(e)** Lung NK cells were analyzed for intracellular GzmB expression by flow cytometry on day 1 after IL-2 Cx injections. Error bars indicate the SEM. Graphs are representative of two independent experiments with 4 mice per group in each.

Supplementary Figure S6

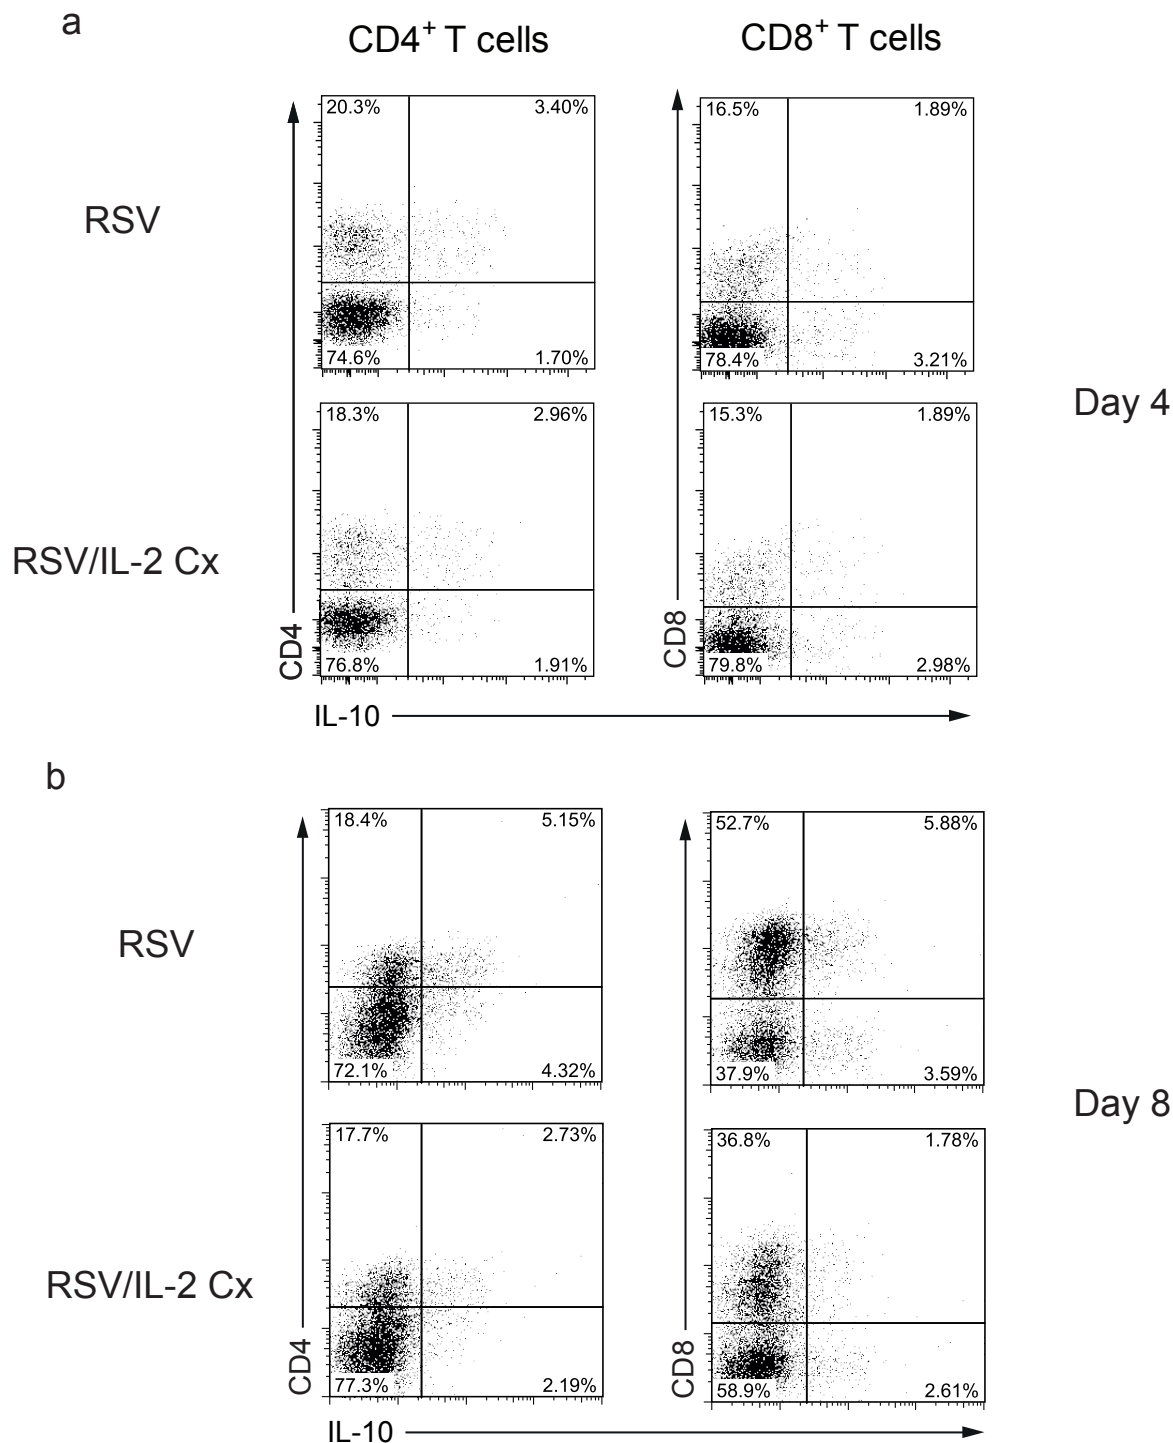

**Supplementary Figure S6.** IL-2 Cx injections do not induce IL-10 expression in T cells. BALB/c mice were infected with RSV i.n. (day 0). When indicated some mice were injected i.p. three times (days 1, 2 and 3 post infection) with IL-2 Cx. **(a and b)** BAL cells were restimulated with PMA and Ionomycin for 3 h. IL-10 expression of CD3 gated, CD4<sup>+</sup> and CD8<sup>+</sup> T cells was analyzed by flow cytometry in the BAL on day 4 **(a)** and day 8 **(b)** post RSV infection. Plots are representative of two independent experiments with 4 mice per group in each.

## Supplementary Figure S7

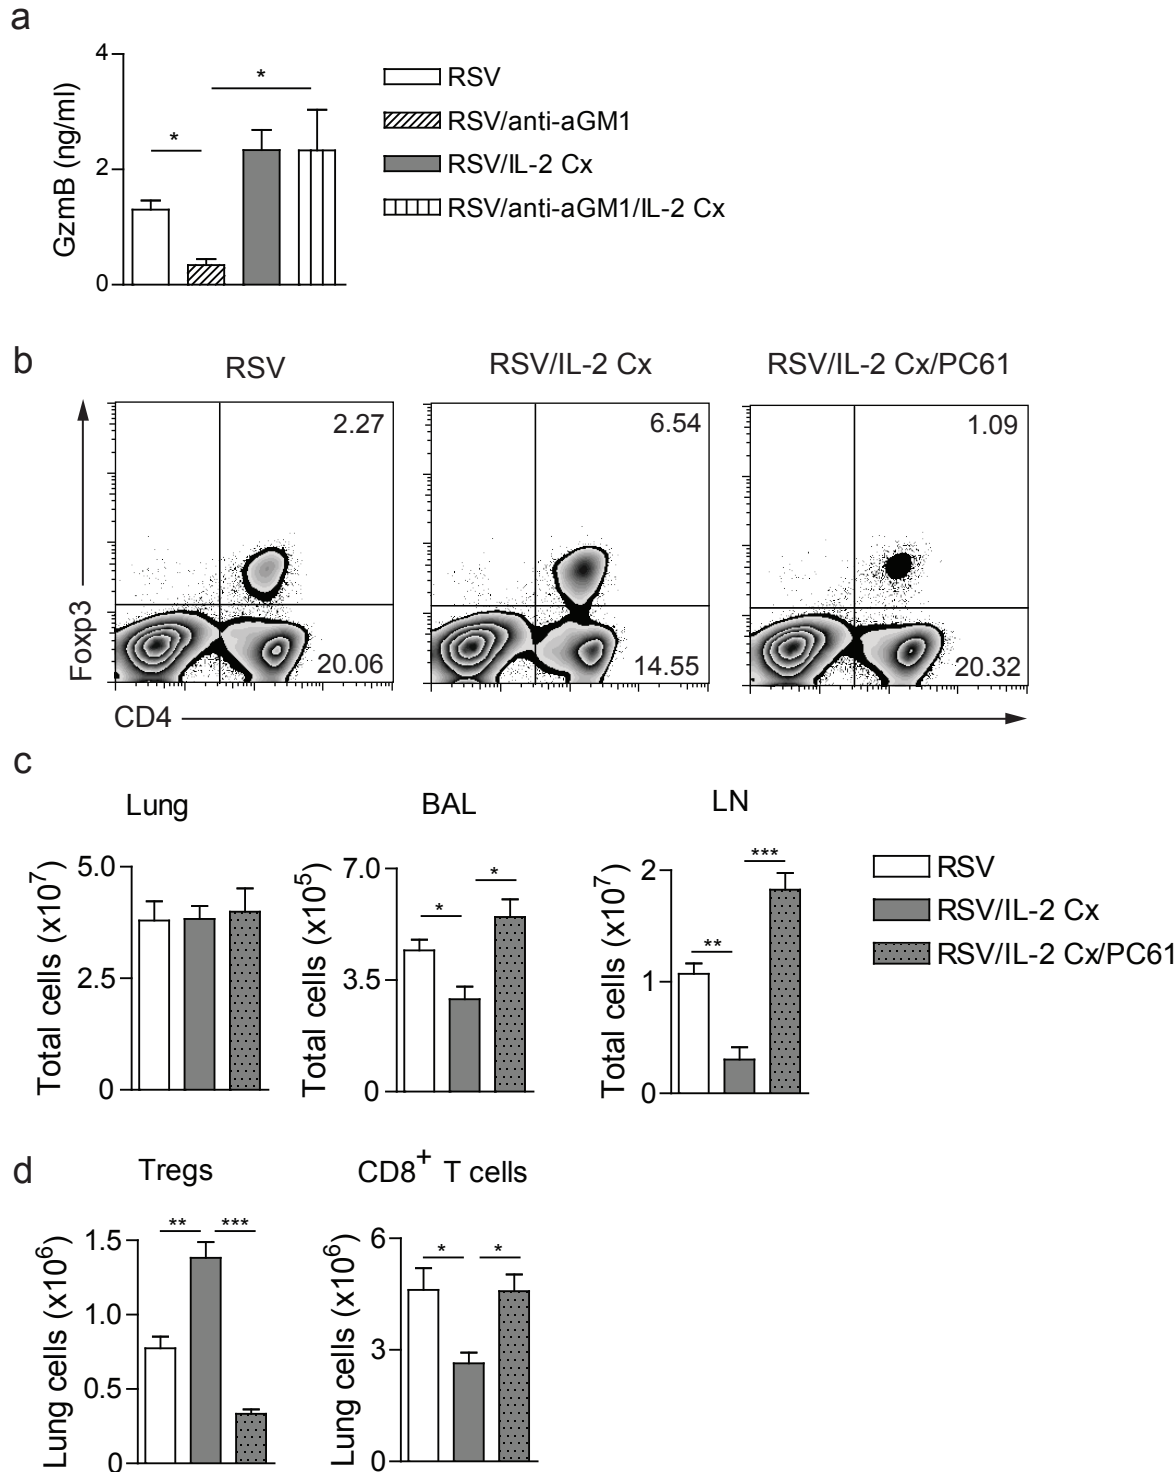

**Supplementary Figure S7.** Tregs and not NK cells limit lung inflammation after IL-2 Cx injections. BALB/c mice were infected with RSV i.n. (day 0). When indicated some mice were injected i.p. three times (days 1, 2 and 3 post infection) with IL-2 Cx and with anti-asialo GM1 (anti-aGM1) given i.p. on days -2, 0 and 3 (a) or PC61 on days -1 and 3 (b, c and d). (a) The concentration of GzmB in the BAL on day 4 post RSV infection was measured by ELISA. (b) Frequencies of CD4<sup>+</sup>Foxp3<sup>-</sup> and CD4<sup>+</sup>Foxp3<sup>+</sup> T cells in the lung on day 8 post infection of RSV, RSV/IL-2 Cx or RSV/IL-2Cx/PC61 mice. (c) Total numbers of cells in the lung, BAL and LN were enumerated on day 8 post infection. (d) Total numbers of Tregs (CD4<sup>+</sup>Foxp3<sup>+</sup>), and CD8<sup>+</sup> T cells in the lung of RSV infected mice were quantified using flow cytometry on day 8 post RSV infection. T cells and Tregs are gated on CD3<sup>+</sup> cells. Error bars indicate the SEM. Graphs show two pooled independent experiments (a) or graphs are representative of two independent experiments with 4-5 mice per group.
